# Supplementary material for: Extending Adjuvant Endocrine Therapy for 10 Years: A Mixed-Methods Analysis of Women’s Decision Making in an Online Breast Cancer Forum
Source: MDPI journal article supplement (doi:10.3390/healthcare9060688), 2021-06-07
Supplement: s1 [file s1]

**Table S1. Proportion of participants who mentioned various codes in the forum, by age group, family status and treatment duration**

| Codes                                                               | By Age            |                     |                   |                      |  | By family status           |                                     |                      |  | By treatment duration |                   |                    |                      |
|---------------------------------------------------------------------|-------------------|---------------------|-------------------|----------------------|--|----------------------------|-------------------------------------|----------------------|--|-----------------------|-------------------|--------------------|----------------------|
|                                                                     | <50yr<br>(n = 19) | 50-60yr<br>(n = 37) | 60+yr<br>(n = 20) | p-value <sup>1</sup> |  | Lives<br>alone<br>(n = 18) | Lives<br>with<br>family<br>(n = 48) | p-value <sup>1</sup> |  | <2yr<br>(n = 36)      | 2-5yr<br>(n = 58) | 5-10yr<br>(n = 36) | p-value <sup>1</sup> |
|                                                                     | %                 | %                   | %                 |                      |  | %                          | %                                   |                      |  | %                     | %                 | %                  |                      |
| Fear of cancer recurrence                                           | 15.8              | 40.5                | 30.0              | 0.166                |  | 22.2                       | 33.3                                | 0.382                |  | 19.4                  | 25.9              | 38.9               | 0.167                |
| Side effects of medication                                          | 94.7              | 94.6                | 95.0              | 0.998                |  | 88.9                       | 95.8                                | 0.292                |  | 94.4                  | 91.4              | 91.7               | 0.851                |
| Trust in drug`s effectiveness                                       | 26.3              | 18.8                | 20.0              | 0.806                |  | 22.2                       | 22.9                                | 0.952                |  | 19.4                  | 13.8              | 27.8               | 0.247                |
| Family as reason for treatment continuation                         | 5.3               | 5.4                 | 5.0               | 0.998                |  | 5.6                        | 12.5                                | 0.414                |  | 5.7                   | 5.2               | 5.6                | 0.995                |
| Using coping mechanisms to alleviate side effects                   | 26.3              | 18.9                | 15.0              | 0.664                |  | 22.2                       | 22.9                                | 0.952                |  | 25.0                  | 24.1              | 16.7               | 0.630                |
| Researching the disease using reliable sources                      | 21.1              | 16.2                | 5.0               | 0.332                |  | 33.3                       | 6.3                                 | <b>0.004</b>         |  | 19.4                  | 22.1              | 5.6                | 0.095                |
| Trust in doctor`s advise                                            | 5.3               | 10.8                | 15.0              | 0.610                |  | 0.0                        | 10.4                                | 0.154                |  | 2.8                   | 8.6               | 11.1               | 0.389                |
| Age as reason for treatment continuation/discontinuation            | 36.8              | 16.2                | 15.0              | 0.149                |  | 16.7                       | 16.7                                | 0.999                |  | 22.2                  | 12.1              | 8.3                | 0.203                |
| Quality of life affected by medication                              | 42.1              | 37.8                | 40.0              | 0.952                |  | 44.4                       | 35.4                                | 0.501                |  | 41.7                  | 31.0              | 33.3               | 0.564                |
| Does not trust medication                                           | 5.3               | 2.7                 | 5.0               | 0.862                |  | 5.6                        | 2.1                                 | 0.464                |  | 2.8                   | 10.3              | 0.0                | 0.070                |
| Does not trust health professional                                  | 10.5              | 10.8                | 10.0              | 0.995                |  | 11.1                       | 6.3                                 | 0.506                |  | 0.0                   | 15.5              | 8.3                | 0.040                |
| Using a test that gives information on risk of cancer recurrence    | 0.0               | 2.7                 | 15.0              | 0.069                |  | 16.7                       | 2.1                                 | <b>0.027</b>         |  | 8.3                   | 5.2               | 0.0                | 0.233                |
| Other condition that is developed or made worse by taking the drugs | 10.5              | 21.6                | 10.0              | 0.397                |  | 16.7                       | 14.6                                | 0.833                |  | 11.1                  | 15.5              | 19.4               | 0.618                |
| Treatment discontinued by doctor                                    | 0.0               | 10.8                | 10.0              | 0.336                |  | 5.6                        | 6.3                                 | 0.916                |  | 0.0                   | 15.5              | 11.1               | 0.050                |
| Brand change (use of the same drug by different brands)             | 10.5              | 8.1                 | 10.0              | 0.947                |  | 5.6                        | 10.4                                | 0.541                |  | 8.3                   | 3.5               | 11.1               | 0.337                |

|                                                             |      |      |      |              |  |      |      |       |  |      |      |      |       |
|-------------------------------------------------------------|------|------|------|--------------|--|------|------|-------|--|------|------|------|-------|
| Switching medication due to intolerance of the first option | 0.0  | 29.7 | 20.0 | <b>0.030</b> |  | 11.1 | 29.2 | 0.127 |  | 13.9 | 19.0 | 25.0 | 0.488 |
| Not coping with side effects                                | 31.6 | 24.3 | 5.0  | 0.100        |  | 5.6  | 25.0 | 0.077 |  | 25.0 | 20.7 | 33.3 | 0.391 |

<sup>1</sup> P-values are calculated with Chi-square test
